# Supplementary material
Source: Springer Nature journal article supplement (https://www.springermedizin.de/resource/supplementary/13054_2005_3674_MOESM1_ESM.pdf/9721026)
Supplement: MOESM1 [file 9721026]

## ADDITIONAL FILE 1

### The Richmond Agitation-Sedation Scale

| Score | Term              | Description                                                                                                    |                           |
|-------|-------------------|----------------------------------------------------------------------------------------------------------------|---------------------------|
| +4    | Combative         | Overtly combative, violent, immediate danger to staff                                                          |                           |
| +3    | Very agitated     | Pulls or removes tube(s) or catheter(s); aggressive                                                            |                           |
| +2    | Agitated          | Frequent non-purposeful movement, fights ventilator                                                            |                           |
| +1    | Restless          | Anxious but movements not aggressive vigorous                                                                  |                           |
| 0     | Alert and calm    |                                                                                                                |                           |
| -1    | Drowsy            | Not fully alert, but has sustained awakening<br>(eye-opening/eye contact) to <i>voice</i> ( $\geq 10$ seconds) | } Verbal<br>Stimulation   |
| -2    | Light sedation    | Briefly awakens with eye contact to <i>voice</i> (<10 seconds)                                                 |                           |
| -3    | Moderate sedation | Movement or eye opening to <i>voice</i> (but no eye contact)                                                   |                           |
| -4    | Deep sedation     | No response to <i>voice</i> , but movement or eye opening<br>to <i>physical</i> stimulation                    | } Physical<br>Stimulation |
| -5    | Unarousable       | No response to <i>voice or physical</i> stimulation                                                            |                           |
